# Supplementary material
Source: PubMed Central journal article supplement (PMC5225078)
Supplement: NIHMS831338-supplement-1.pdf [file NIHMS831338-supplement-1.pdf]

**Supplemental table 1. AA, EPA and DHA bioactive metabolome:  
CLP infectious exudates from WT and DRV2-KO.**

| LM levels in mouse exudate (pg/ml) |     |     |         |   |       |         |   |       |              |   |        |              |   |        |
|------------------------------------|-----|-----|---------|---|-------|---------|---|-------|--------------|---|--------|--------------|---|--------|
| AA bioactive metabolome            | Q1  | Q3  | WT veh. |   |       | WT RvD2 |   |       | DRV2-KO veh. |   |        | DRV2-KO RvD2 |   |        |
| LXA <sub>4</sub>                   | 351 | 115 | 8.0     | ± | 4.5   | 16.1    | ± | 14.2  | 9.3          | ± | 6.3    | 6.9          | ± | 2.9    |
| LXB <sub>4</sub>                   | 351 | 221 | 82.9    | ± | 24.3  | 156.5   | ± | 40.7  | 162.4        | ± | 37.3   | 177.1        | ± | 30.4   |
| 5S,15S-diHETE                      | 335 | 235 | 53.0    | ± | 14.1  | 52.1    | ± | 10.8  | 63.4         | ± | 30.9   | 77.4         | ± | 13.3   |
| AT-LXA <sub>4</sub>                | 351 | 115 | 13.7    | ± | 5.5   | 17.1    | ± | 9.4   | 14.3         | ± | 3.6    | 21.0         | ± | 4.6    |
| AT-LXB <sub>4</sub>                | 351 | 221 | 14.4    | ± | 9.9   | 45.6    | ± | 38.7  | 23.1         | ± | 15.0   | 28.7         | ± | 14.8   |
| LTB <sub>4</sub>                   | 335 | 195 | 857.3   | ± | 227.3 | 903.3   | ± | 343.8 | 1825.3       | ± | 296.2  | 2459.0       | ± | 629.4  |
| PGD <sub>2</sub>                   | 351 | 233 | 312.9   | ± | 107.4 | 329.1   | ± | 66.3  | 389.0        | ± | 116.0  | 558.7        | ± | 158.7  |
| PGE <sub>2</sub>                   | 351 | 189 | 1326.1  | ± | 595.5 | 2554.3  | ± | 615.3 | 2800.8       | ± | 1079.5 | 3490.1       | ± | 889.0  |
| PGF <sub>2α</sub>                  | 353 | 193 | 1358.2  | ± | 540.4 | 608.3   | ± | 115.5 | 1817.8       | ± | 996.1  | 2050.9       | ± | 1046.0 |
| TXB <sub>2</sub>                   | 369 | 169 | 589.4   | ± | 72.7  | 755.1   | ± | 162.5 | 1128.9       | ± | 237.8  | 1492.0       | ± | 206.1  |
| <b>DHA bioactive metabolome</b>    |     |     |         |   |       |         |   |       |              |   |        |              |   |        |
| RvD1                               | 375 | 121 | 15.0    | ± | 9.8   | 7.6     | ± | 2.3   | 5.7          | ± | 1.9    | 8.9          | ± | 3.4    |
| RvD2                               | 375 | 175 | 12.0    | ± | 5.6   | 196.3   | ± | 81.2  | 8.9          | ± | 2.9    | 121.0        | ± | 41.4   |
| RvD3                               | 375 | 147 | 0.4     | ± | 0.1   | 1.2     | ± | 0.5   | 0.5          | ± | 0.2    | 1.0          | ± | 0.3    |
| RvD4                               | 359 | 255 | 30.4    | ± | 5.4   | 43.8    | ± | 17.2  | 54.8         | ± | 28.0   | 43.0         | ± | 11.4   |
| RvD5                               | 359 | 199 | 65.1    | ± | 19.9  | 74.9    | ± | 22.9  | 68.9         | ± | 36.8   | 115.6        | ± | 43.4   |
| AT-RvD1                            | 375 | 121 | 30.3    | ± | 12.9  | 35.0    | ± | 15.2  | 17.3         | ± | 9.7    | 21.6         | ± | 7.1    |
| AT-RVD3                            | 375 | 147 | 0.7     | ± | 0.2   | 3.4     | ± | 1.5   | 1.4          | ± | 0.8    | 2.6          | ± | 1.3    |
| PD1                                | 359 | 153 | 2.8     | ± | 0.5   | 4.2     | ± | 1.1   | 4.1          | ± | 0.6    | 5.7          | ± | 1.2    |
| 10S,17S-diHDHA                     | 359 | 153 | 3.9     | ± | 0.4   | 2.3     | ± | 0.4   | 3.9          | ± | 0.7    | 2.6          | ± | 0.5    |
| AT-PD1                             | 359 | 153 | 11.0    | ± | 5.8   | 8.3     | ± | 1.3   | 17.2         | ± | 13.2   | 15.0         | ± | 4.7    |
| MaR1                               | 359 | 221 | 12.4    | ± | 6.3   | 6.7     | ± | 2.2   | 26.8         | ± | 18.0   | 21.6         | ± | 7.2    |
| 7S,14S-diHDHA                      | 359 | 221 | 33.0    | ± | 18.5  | 30.3    | ± | 6.9   | 125.6        | ± | 93.3   | 99.3         | ± | 33.5   |
| 4S,14S-diHDHA                      | 359 | 101 | 527.9   | ± | 193.9 | 126.3   | ± | 38.9  | 278.1        | ± | 80.6   | 155.9        | ± | 54.9   |
| <b>EPA bioactive metabolome</b>    |     |     |         |   |       |         |   |       |              |   |        |              |   |        |
| RvE1                               | 349 | 195 | 15.1    | ± | 3.5   | 45.5    | ± | 20.9  | 47.3         | ± | 22.8   | 34.7         | ± | 12.0   |
| RvE2                               | 333 | 253 | 4.4     | ± | 1.1   | 4.9     | ± | 2.2   | 6.4          | ± | 1.5    | 5.7          | ± | 2.2    |
| RvE3                               | 333 | 201 | 4.7     | ± | 1.5   | 3.0     | ± | 0.5   | 3.3          | ± | 1.3    | 2.2          | ± | 0.4    |

Exudates from mouse after CLP were collected as described then were extracted and LM levels investigated using LM metabolipidomics (see materials and methods for details). Values are express as mean ± SEM.

**Supplemental Table 2. Proteome profiling of CLP infectious exudates from WT and DRV2-KO with RvD2 treatment**

| Cytokines, chemokines and growth factor | <i>P</i> value |                  | <i>P</i> value |                                 | <i>P</i> value |
|-----------------------------------------|----------------|------------------|----------------|---------------------------------|----------------|
| Adiponectin/Acrp30                      | 0.431          | DPPIV/CD26       | 0.175          | IL-27                           | 0.193          |
| Amphiregulin                            | 0.055          | EGF              | 0.159          | IL-28                           | 0.093          |
| Angiopoietin-1                          | 0.170          | Endoglin/CD105   | 0.258          | IL-33                           | 0.109          |
| Angiopoietin-2                          | 0.206          | Endostatin       | 0.477          | LDL R                           | 0.193          |
| Angiopoietin-like 3                     | 0.128          | Fetuin A/AHSG    | 0.376          | Leptin                          | 0.251          |
| BAFF/BLyS/TNFSF13B                      | 0.200          | FGF acidic       | 0.249          | LIF                             | 0.119          |
| C1q R1/CD93                             | 0.239          | FGF-21           | 0.086          | Lipocalin-2/NGAL,               | 0.176          |
| CCL2/JE/MCP-1                           | 0.293          | Flt-3 Ligand     | 0.062          | <b>LIX</b>                      | <b>0.007</b> * |
| CCL3/CCL4 MIP-1 alpha/beta              | 0.242          | Gas6             | 0.305          | M-CSF                           | 0.124          |
| CCL5/RANTES                             | 0.242          | G-CSF            | 0.447          | MMP-2                           | 0.147          |
| CCL6/C10                                | 0.241          | GDF-15           | 0.158          | MMP-3                           | 0.002 *        |
| CCL11/Eotaxin                           | 0.145          | GM-CSF           | --             | MMP-9                           | 0.016 *        |
| CCL12/MCP-5                             | 0.411          | HGF              | 0.258          | Myeloperoxidase                 | 0.057          |
| CCL17/TARC                              | 0.079          | ICAM-1/CD54      | 0.334          | Osteopontin (OPN)               | 0.204          |
| CCL19/MIP-3 beta                        | 0.223          | IFN-gamma        | --             | Osteoprotegerin/TNFRSF11B       | 0.383          |
| CCL20/MIP-3 alpha                       | 0.170          | IGFBP-1          | 0.402          | PD-ECGF/Thymidine phosphorylase | 0.189          |
| CCL21/6CKine                            | 0.120          | IGFBP-2          | 0.471          | PDGF-BB                         | 0.052          |
| CCL22/MDC                               | 0.105          | IGFBP-3          | 0.251          | <b>Pentraxin 2/SAP</b>          | <b>0.036</b> * |
| CD14                                    | 0.071          | IGFBP-5          | 0.084          | <b>Pentraxin 3/ TSG-14</b>      | <b>0.038</b> * |
| CD40/TNFRSF5                            | 0.083          | IGFBP-6          | 0.283          | Periostin/OSF-2                 | 0.101          |
| CD160                                   | 0.192          | IL-1 alpha/IL1F1 | 0.326          | Pref-1/DLK-1/FA1                | 0.085          |
| Chemerin                                | 0.184          | IL-1 beta/IL-1F2 | 0.089          | Proliferin                      | 0.086          |
| Chitinase 3-like 1                      | 0.460          | IL-1ra/IL-1F3    | 0.351          | Protein Convertase 9/PCSK9      | --             |
| Coagulation Factor III/Tissue Factor    | 0.111          | IL-2             | --             | RAGE                            | 0.438          |
| Complement Component C5/C5a             | 0.067          | IL-3             | --             | RBP4                            | --             |
| Complement Factor D                     | 0.230          | IL-4             | 0.231          | <b>Reg3G</b>                    | <b>0.018</b> * |
| C-Reactive Protein/CRP                  | 0.308          | IL-5             | 0.095          | Resistin                        | 0.309          |
| CX3CL1/Fractalkine                      | 0.085          | IL-6             | 0.338          | E-Selectin/CD62E                | 0.099          |
| CXCL1/KC                                | 0.405          | <b>IL-7</b>      | --             | P-Selectin/CD62P                | 0.126          |
| CXCL2/MIP-2                             | 0.479          | IL-10            | 0.238          | Serpin E1/PAI-1                 | 0.282          |
| CXCL9/MIG                               | 0.198          | IL-11            | 0.225          | <b>Serpin F1/PEDF</b>           | <b>0.019</b> * |
| CXCL10/IP-10                            | 0.238          | IL-12p40         | 0.167          | Thrombopoietin                  | 0.158          |
| CXCL11/I-TAC                            | 0.096          | IL-13            | 0.107          | TIM-1/KIM-1/HAVCR               | 0.086          |
| CXCL13/BLC/BCA-1                        | 0.350          | IL-15            | 0.091          | TNF-alpha                       | 0.158          |
| CXCL16                                  | 0.109          | IL-17A           | 0.323          | VCAM-1/CD106                    | 0.261          |
| Cystatin C                              | 0.282          | <b>IL-22</b>     | <b>0.036</b> * | VEGF                            | 0.205          |
| Dkk-1                                   | 0.199          | IL-23            | 0.112          | WISP-1/CCN4                     | 0.182          |

\**p*<0.05; -- not detected

Peritoneal lavages were collected at 12h post CLP. Cell-free supernatants were collected by centrifugation. A 1:10 dilution of the supernatant (150µl) were incubated with the pre-coated Proteome Profiler array membranes (ARY028, Mouse Cytokine Antibody array kit; R&D Systems) and processed according to the manufacturer's instructions. Densitometric analysis of dot blots was performed using Image J software (National Institute of Health, Bethesda, MD, USA). *P* values were obtained by comparing WT+ RvD2 vs. DRV2-KO + RvD2 groups using 2-tailed Student's *t* test. \**p*<0.05; -- not detected.

### Supplemental Table 3. Antibodies used for mass cytometry

| Target epitope             | Clone         | Isotopic label | Supplier  |
|----------------------------|---------------|----------------|-----------|
| CD45                       | 30-F11        | Pr 141         | LMA CyTOF |
| pAKT (S473)                | D9E           | Sm 152         | Fluidigm  |
| p-p38 (T180/Y182)          | D3F9          | Gd 156         | Fluidigm  |
| pStat3 (Y705)              | 4             | Gd 158         | Fluidigm  |
| pStat1 (Y701)              | 58D6          | Gd 160         | LMA CyTOF |
| pNF- $\kappa$ b p65 (S529) | K10-895.12.50 | ER166          | Fluidigm  |
| pEER1/2 (T202/Y204)        | D13.14.4E     | Er 167         | Fluidigm  |
| CD11b                      | M1/70         | Tm 169         | LMA CyTOF |
| pS6 (S235/S236)            | N7-548        | Yb 172         | Fluidigm  |
| pStat5 (Y694)              | D47/E7 XP     | Yb 174         | LMA CyTOF |
| F4/80                      | BM8           | Lu 175         | LMA CyTOF |
| pCREB (S133)               | 87G3          | Yb 176         | Fluidigm  |

LMA CyTOF (Longwood Medical Areas CyTOF Antibody Resources Core; Brigham and Women's Hospital)

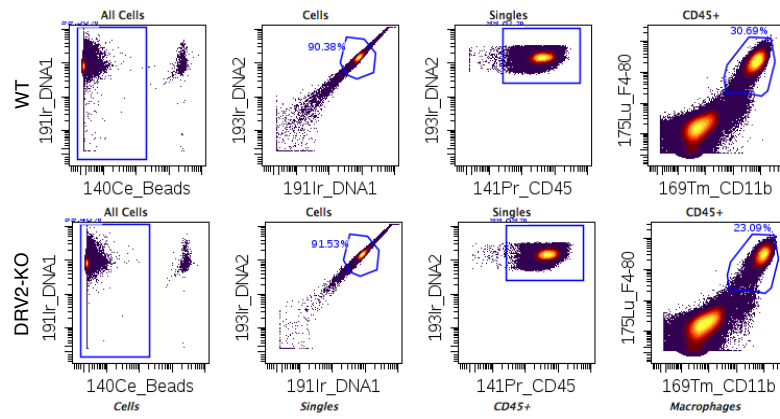

**Supplementary Figure 1.** Sequential gating strategy used to identify resident peritoneal macrophages (CD11b<sup>+</sup>F4/80<sup>+</sup>) for CyTOF
